# Supplementary material
Source: publisher site journal article supplement (https://www.dovepress.com/article/449888)
Supplement: Supplementary file 1 [file get_supplementary_file.php]

**Supporting Information**

**AMP-coated TiO2 doped ZnO nanomaterials enhanced antibacterial activity by generating higher levels of hydroxyl radicals.**

Qianyu Bai1, *, Yichi Zhang1, *, Runqiu Cai1, Haiyan Wu1, Huiqun Fu2, Xuemei Zhou2*, Jie Chai3, Xuepeng Teng3 and Tianlong Liu 1*

1 China agriculture university, College of Veterinary Medicine, National Key Laboratory of Veterinary Public Health and Safety, Yuanmingyuan West Road No.2, Beijing.

2 101 Institute of the Ministry of Civil Affairs, Beijing, China.

3 Shandong Cancer Hospital and Institute, Shandong First Medical University and Shandong Academy of Medical Sciences, Jinan, 250117, China


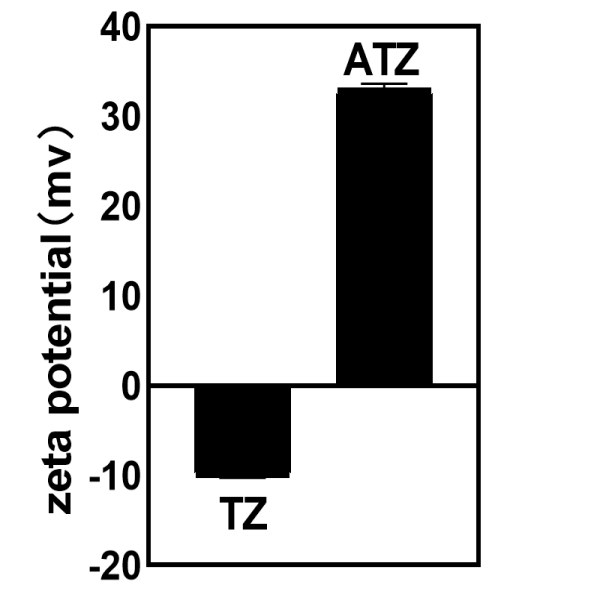


**Figure S1.** Zeta potential of TZ and ATZ nanoparticles. TZ NPs has a negative surface charge of -10.17mV and a potential value of -10.17 ±0.05mV, while ATZ NPs has a positive surface charge of 33.04mV and a potential value of 33.04±0.46mV. The potential change of nanoparticles confirmed the successful adsorption of AMP.
